# Supplementary material for: Transcriptome analysis of ruminal epithelia revealed potential regulatory mechanisms involved in host adaptation to gradual high fermentable dietary transition in beef cattle
Source: PubMed Central journal article supplement (PMC5735905; doi:10.1186/s12864-017-4317-y), 2017-12-19
Supplement: 12864_2017_4317_MOESM3_ESM.pdf [file 12864_2017_4317_MOESM3_ESM.pdf]

### Ions transportation related genes

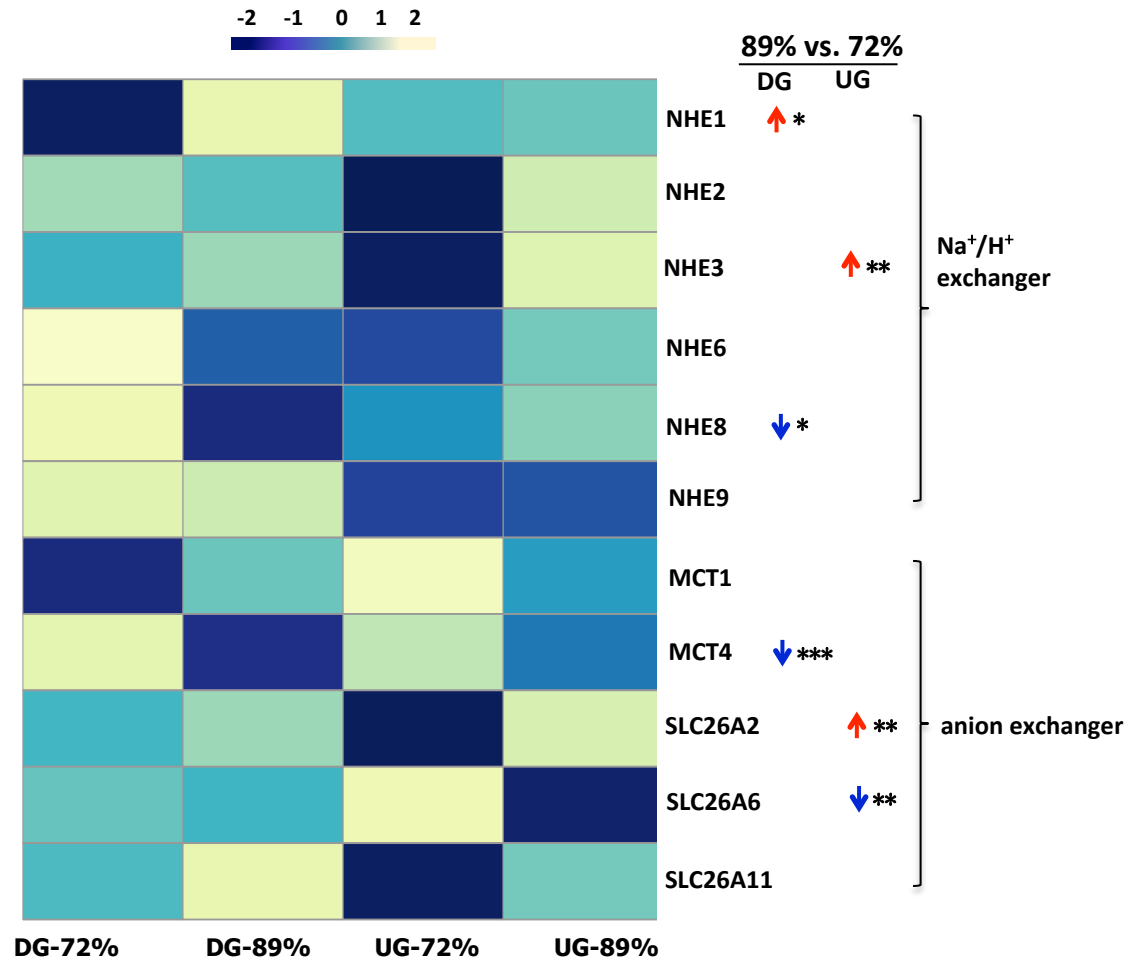

Fig S1. Zhao *et al*
